# Supplementary material for: Periodontitis is associated with an increased risk for proximal colorectal neoplasms
Source: PubMed Central journal article supplement (PMC6525177; doi:10.1038/s41598-019-44014-8), 2019-05-17
Supplement: 41598_2019_44014_MOESM1_ESM.pdf [file 41598_2019_44014_MOESM1_ESM.pdf]

## **Periodontitis is associated with an increased risk for proximal colorectal neoplasms**

Gun Woo Kim<sup>1</sup>, Young Sang Kim<sup>2</sup>, Soo Hyun Lee<sup>2</sup>, Seung Geon Park<sup>2</sup>, Duk Hwan Kim<sup>1</sup>, Joo Young Cho<sup>1</sup>, Ki Baik Hahm<sup>1</sup>, Sung Pyo Hong<sup>1</sup>, and Jun Hwan Yoo<sup>1\*</sup>

### **Supplementary Table legends**

**Supplementary Table S1.** Univariate analysis of risk factors for colorectal neoplasms according to location in the whole study group (including control). Variables shown are numbers (percentages) or expressed as the mean  $\pm$  standard deviation. \*Some data are missing. †Differences in the categorical variables between the groups were analyzed using Chi-square test or Fisher's exact test. Continuous variables were compared by Student's t-test. Abbreviations: HDL, High-density lipoprotein; LDL, Low-density lipoprotein; FH of CRC, Family history of colorectal cancer; CRNs, Colorectal neoplasms; SF, Splenic flexure; HF, Hepatic flexure; Proximal AC, Proximal half of the ascending colon.

**Supplementary Table S2.** Univariate analysis of risk factors for proximal colorectal neoplasms (cecum to SF) in the periodontitis group. Variables shown are numbers (percentages) or expressed as the mean  $\pm$  standard deviation. \*Some data are missing. †Differences in the categorical variables between the groups were analyzed using Chi-square test or Fisher's exact test. Continuous variables were compared by Student's t-test. Abbreviations: HDL, High-density lipoprotein; LDL, Low-density lipoprotein; FH of CRC, Family history of colorectal cancer; SF,

Splenic flexure.

**Supplementary Table S3.** Multivariate analysis of risk factors for proximal colorectal neoplasms (cecum to SF) in the periodontitis group. Abbreviations: SF, Splenic flexure.

**Supplementary Table S4.** Univariate analysis of risk factors for advanced colorectal neoplasms and proximal advanced colorectal neoplasms in the whole study group (including control). Variables shown are numbers (percentages) or expressed as the mean  $\pm$  standard deviation. \*Some data are missing. †Differences in the categorical variables between the groups were analyzed using Chi-square test or Fisher's exact test. Continuous variables were compared by Student's t-test. Abbreviations: HDL, High-density lipoprotein; LDL, Low-density lipoprotein; FH of CRC, Family history of colorectal cancer.

**Supplementary Table S1.**

| Variable                           | All CRNs            |                     | <i>P</i><br>value†  | Proximal CRNs       |                     | <i>P</i><br>value†  | More proximal CRNs  |                    | <i>P</i><br>value† | Most proximal CRNs     |                 | <i>P</i><br>value† |
|------------------------------------|---------------------|---------------------|---------------------|---------------------|---------------------|---------------------|---------------------|--------------------|--------------------|------------------------|-----------------|--------------------|
|                                    | (Cecum to rectum)   |                     |                     | (Cecum to SF)       |                     |                     | (Cecum to HF)       |                    |                    | (Cecum to Proximal AC) |                 |                    |
|                                    | Absence<br>(n=1926) | Presence<br>(n=578) | Absence<br>(n=2169) | Presence<br>(n=335) | Absence<br>(n=2302) | Presence<br>(n=202) | Absence<br>(n=2412) | Presence<br>(n=92) |                    |                        |                 |                    |
| Periodontitis                      | 140 (7.3)           | 76 (13.1)           | <0.001              | 162 (7.5)           | 54 (16.1)           | <0.001              | 181 (7.9)           | 35 (17.3)          | <0.001             | 190 (7.9)              | 26 (28.3)       | <0.001             |
| Male sex                           | 1017 (52.8)         | 394 (68.2)          | <0.001              | 1179 (54.4)         | 232 (69.3)          | <0.001              | 1282 (55.7)         | 129 (63.9)         | 0.025              | 1351 (56.0)            | 60 (65.2)       | 0.081              |
| Age, years                         | 44.6±10.4           | 51.9±10.9           | <0.001              | 45.2±10.6           | 53.5±10.9           | <0.001              | 45.6±10.7           | 54.4±10.5          | <0.001             | 46.0±10.9              | 55.0±10.3       | <0.001             |
| Body mass index, kg/m <sup>2</sup> | 23.6±3.4            | 24.5±3.1            | <0.001              | 23.7±3.4            | 24.6±3.1            | <0.001              | 23.8±3.4            | 24.3±3.0           | 0.019              | 23.8±3.3               | 24.3±3.0        | 0.147              |
| Metabolic syndrome                 | 185 (9.6)           | 86 (14.9)           | <0.001              | 220 (10.1)          | 51 (15.2)           | 0.005               | 244 (10.6)          | 27 (13.4)          | 0.225              | 260 (10.8)             | 11 (12.0)       | 0.721              |
| Waist circumference, cm            | 83.8±9.4            | 86.6±8.9            | <0.001              | 84.1±9.4            | 87.2±8.7            | <0.001              | 84.3±9.4            | 86.2±8.6           | 0.004              | 84.4±9.4               | 86.7±8.7        | 0.022              |
| Hypertension                       | 519 (26.9)          | 237 (41.0)          | <0.001              | 606 (27.9)          | 150 (44.8)          | <0.001              | 665 (28.9)          | 91 (45.0)          | <0.001             | 713 (29.6)             | 43 (46.7)       | <0.001             |
| High fasting glucose               | 201 (10.4)          | 129 (22.3)          | <0.001              | 247 (11.4)          | 83 (24.8)           | <0.001              | 280 (12.2)          | 50 (24.8)          | <0.001             | 304 (12.6)             | 26 (28.3)       | <0.001             |
| Triglycerides, mg/dL               | 111.4±74.9          | 125.0±88.4          | 0.001               | 112.4±75.0          | 128.5±96.4          | 0.004               | 113.6±76.9          | 125.5±93.3         | 0.039              | 114.1±77.8             | 126.3±91.8      | 0.144              |
| HDL, mg/dL                         | 58.9±16.0           | 55.5±14.8           | <0.001              | 58.6±16.0           | 54.8±14.1           | <0.001              | 58.3±15.9           | 55.9±14.1          | 0.037              | 58.3±15.9              | 54.5±12.5       | 0.006              |
| LDL, mg/dL                         | 131.0±33.6          | 131.5±35.8          | 0.746               | 131.2±33.8          | 130.5±36.3          | 0.722               | 131.2±34.0          | 129.9±36.0         | 0.605              | 131.0±34.1             | 133.1±35.0      | 0.565              |
| Total cholesterol, mg/dL           | 202.4±35.4          | 201.6±39.0          | 0.637               | 202.6±35.8          | 200.1±39.0          | 0.256               | 202.4±36.1          | 200.0±37.5         | 0.373              | 202.3±36.2             | 201.6±36.6      | 0.872              |
| Smoking (ever)*                    | 805/1924<br>(41.8)  | 329/576<br>(57.1)   | <0.001              | 934/2167<br>(43.1)  | 200/333<br>(60.1)   | <0.001              | 1019/2300<br>(44.3) | 115/200<br>(57.5)  | <0.001             | 1082/2410<br>(44.9)    | 52/90<br>(57.8) | 0.016              |
| Alcohol consumption*               | 1020/1924<br>(53.0) | 322/576<br>(55.9)   | 0.223               | 1152/2167<br>(53.2) | 190/333<br>(57.1)   | 0.184               | 1240/2300<br>(53.9) | 102/200<br>(51.0)  | 0.428              | 1298/2410<br>(53.9)    | 44/90<br>(48.9) | 0.353              |
| FH of CRC                          | 97 (5.0)            | 47 (8.1)            | 0.005               | 115 (5.3)           | 29 (8.7)            | 0.014               | 125 (5.4)           | 19 (9.4)           | 0.020              | 133 (5.5)              | 11 (12.0)       | 0.009              |
| Aspirin use                        | 49 (2.5)            | 31 (5.4)            | 0.001               | 56 (2.6)            | 24 (7.2)            | <0.001              | 67 (2.9)            | 13 (6.4)           | 0.006              | 71 (2.9)               | 9 (9.8)         | <0.001             |
| Fatty liver                        | 588 (30.5)          | 236 (40.8)          | <0.001              | 675 (31.1)          | 149 (44.5)          | <0.001              | 745 (32.4)          | 79 (39.1)          | 0.050              | 782 (32.4)             | 42 (45.7)       | 0.008              |
| Physical activity                  | 1132 (58.8)         | 328 (56.7)          | 0.386               | 1261 (58.1)         | 199 (59.4)          | 0.662               | 1339 (58.2)         | 121 (59.9)         | 0.632              | 1402 (58.1)            | 58 (63.0)       | 0.348              |
| Diverticulosis                     | 48 (2.5)            | 17 (2.9)            | 0.552               | 54 (2.5)            | 11 (3.3)            | 0.395               | 56 (2.4)            | 9 (4.5)            | 0.083              | 60 (2.5)               | 5 (5.4)         | 0.081              |
| Tooth loss                         | 123 (6.4)           | 66 (11.4)           | <0.001              | 144 (6.6)           | 45 (13.4)           | <0.001              | 160 (7.0)           | 29 (14.4)          | <0.001             | 166 (6.9)              | 23 (25.0)       | <0.001             |
| Cavities                           | 199 (10.3)          | 52 (9.0)            | 0.348               | 228 (10.5)          | 23 (6.9)            | 0.039               | 234 (10.2)          | 17 (8.4)           | 0.427              | 242 (10.0)             | 9 (9.8)         | 0.937              |

**Supplementary Table S2.**

| Variable                           | Proximal colorectal neoplasms<br>(Cecum to SF) |                    | <i>P</i><br>value† |
|------------------------------------|------------------------------------------------|--------------------|--------------------|
|                                    | Absence<br>(n=162)                             | Presence<br>(n=54) |                    |
| Male sex                           | 99 (61.1)                                      | 43 (79.6)          | 0.013              |
| Age, years                         | 49.8±11.0                                      | 58.2±9.3           | <0.001             |
| Body mass index, kg/m <sup>2</sup> | 24.4±3.4                                       | 24.9±3.1           | 0.340              |
| Metabolic syndrome                 | 24 (14.8)                                      | 9 (16.7)           | 0.743              |
| Waist circumference, cm            | 86.0±9.2                                       | 87.4±7.2           | 0.327              |
| Hypertension                       | 64 (39.5)                                      | 30 (55.6)          | 0.057              |
| High fasting glucose               | 34 (21.0)                                      | 18 (33.3)          | 0.066              |
| Triglycerides, mg/dL               | 117.6±81.7                                     | 127.4±96.7         | 0.468              |
| HDL, mg/dL                         | 55.7±17.6                                      | 52.2±12.4          | 0.108              |
| LDL, mg/dL                         | 129.5±33.8                                     | 127.1±30.1         | 0.641              |
| Total cholesterol, mg/dL           | 201.6±39.1                                     | 195.8±33.0         | 0.322              |
| Smoking (ever)*                    | 94 (58.0)                                      | 37 (68.5)          | 0.172              |
| Alcohol consumption*               | 78 (48.1)                                      | 34 (63.0)          | 0.059              |
| FH of CRC                          | 11 (6.8)                                       | 5 (9.3)            | 0.549              |
| Aspirin use                        | 9 (5.6)                                        | 6 (11.1)           | 0.164              |
| Fatty liver                        | 51 (31.5)                                      | 27 (50.0)          | 0.014              |
| Physical activity                  | 92 (56.8)                                      | 31 (57.4)          | 0.937              |
| Diverticulosis                     | 10 (6.2)                                       | 0 (0.0)            | 0.070              |
| Tooth loss                         | 144 (88.9)                                     | 45 (83.3)          | 0.285              |
| Cavities                           | 47 (29.0)                                      | 8 (14.8)           | 0.047              |

**Supplementary Table S3.**

| <b>Variable</b>                                        | <b><i>P</i> value</b> | <b>Odds ratio</b> | <b>95% confidence interval</b> |              |
|--------------------------------------------------------|-----------------------|-------------------|--------------------------------|--------------|
|                                                        |                       |                   | <b>Lower</b>                   | <b>Upper</b> |
| <b>Proximal colorectal neoplasms<br/>(Cecum to SF)</b> |                       |                   |                                |              |
| Age                                                    | <0.001                | 1.088             | 1.051                          | 1.127        |
| Male                                                   | 0.004                 | 3.259             | 1.474                          | 7.207        |

**Supplementary Table S4.**

| Variable                           | Advanced             |                    | <i>P</i><br>value† | Proximal advanced    |                    | <i>P</i><br>value† |
|------------------------------------|----------------------|--------------------|--------------------|----------------------|--------------------|--------------------|
|                                    | colorectal neoplasms |                    |                    | colorectal neoplasms |                    |                    |
|                                    | Absence<br>(n=2461)  | Presence<br>(n=43) |                    | Absence<br>(n=2477)  | Presence<br>(n=27) |                    |
| Periodontitis                      | 207 (8.4)            | 9 (20.9)           | 0.004              | 209 (8.4)            | 7 (25.9)           | 0.001              |
| Male sex                           | 1386 (56.3)          | 25 (58.1)          | 0.811              | 1396 (56.4)          | 15 (55.6)          | 0.933              |
| Age, years                         | 46.2±10.9            | 53.3±11.1          | <0.001             | 46.2±10.9            | 54.2±11.0          | <0.001             |
| Body mass index, kg/m <sup>2</sup> | 23.8±3.3             | 24.9±3.3           | 0.027              | 23.8±3.3             | 24.5±2.7           | 0.291              |
| Metabolic syndrome                 | 261 (10.6)           | 10 (23.3)          | 0.008              | 267 (10.8)           | 4 (14.8)           | 0.526              |
| Waist circumference, cm            | 84.4±9.4             | 88.2±8.4           | 0.009              | 84.5±9.4             | 86.4±6.8           | 0.288              |
| Hypertension                       | 733 (29.8)           | 23 (53.5)          | 0.001              | 741 (29.9)           | 15 (55.6)          | 0.004              |
| High fasting glucose               | 319 (13.0)           | 11 (25.6)          | 0.015              | 325 (13.1)           | 5 (18.5)           | 0.410              |
| Triglycerides, mg/dL               | 114.2±78.4           | 132.9±78.5         | 0.123              | 114.5±78.5           | 121.6±67.2         | 0.638              |
| HDL, mg/dL                         | 58.2±15.9            | 55.4±12.1          | 0.143              | 58.2±15.8            | 53.3±12.2          | 0.049              |
| LDL, mg/dL                         | 131.1±34.2           | 132.2±30.6         | 0.829              | 131.0±34.2           | 138.1±27.2         | 0.285              |
| Total cholesterol, mg/dL           | 202.2±36.3           | 203.1±33.5         | 0.871              | 202.2±36.3           | 205.3±25.1         | 0.656              |
| Smoking (ever)*                    | 1110/2457 (45.2)     | 24/43 (55.8)       | 0.165              | 1118/2473 (45.2)     | 16/27 (59.3)       | 0.145              |
| Alcohol consumption*               | 1318/2457 (53.6)     | 24/43 (55.8)       | 0.777              | 1327/2473 (53.7)     | 15/27 (55.6)       | 0.844              |
| FH of CRC                          | 138 (5.6)            | 6 (14.0)           | 0.020              | 139 (5.6)            | 5 (18.5)           | 0.004              |
| Aspirin use                        | 80 (3.3)             | 0 (0.0)            | 0.401              | 80 (3.2)             | 0 (0.0)            | 1.000              |
| Fatty liver                        | 803 (32.6)           | 21 (48.8)          | 0.025              | 811 (32.7)           | 13 (48.1)          | 0.090              |
| Physical activity                  | 1437 (58.4)          | 23 (53.5)          | 0.518              | 1444 (58.3)          | 16 (59.3)          | 0.920              |
| Diverticulosis                     | 63 (2.6)             | 2 (4.7)            | 0.308              | 64 (2.6)             | 1 (3.7)            | 0.510              |
| Tooth loss                         | 181 (7.4)            | 8 (18.6)           | 0.006              | 183 (7.4)            | 6 (22.2)           | 0.004              |
| Cavities                           | 247 (10.0)           | 4 (9.3)            | 1.000              | 250 (10.1)           | 1 (3.7)            | 0.513              |
